# Supplementary material
Source: PubMed Central journal article supplement (PMC3132223)
Supplement: NIHMS299810-supplement-Supp_Figure_S1-S10_Table_S1-S3.pdf [file NIHMS299810-supplement-Supp_Figure_S1-S10_Table_S1-S3.pdf]

# Trifluoperazine Regulation of Calmodulin Binding to Fas: A Computational Study

Di Pan<sup>1</sup>, Qi Yan<sup>1</sup>, Yabing Chen<sup>2,3</sup>, Jay M McDonald<sup>2,3</sup>, Yuhua Song<sup>1\*</sup>

Department of Biomedical Engineering<sup>1</sup> and Pathology<sup>2</sup>, The University of Alabama at Birmingham, VA Medical Center<sup>3</sup>, Birmingham, AL 35294

Running Title: Role of TFP in CaM-Fas binding

## Supporting Information

\* To whom correspondence should be addressed:  
Department of Biomedical Engineering  
The University of Alabama at Birmingham  
803 Shelby Interdisciplinary Biomedical Research Building  
1825 University Boulevard  
Birmingham, AL 35294  
Phone: (205) 996-6939 Fax: (205) 975-4919  
Email: [yhsong@uab.edu](mailto:yhsong@uab.edu)  
Web: <http://www.eng.uab.edu/yhsong>

## Trifluoperazine (TFP) structure and force field charge parameters

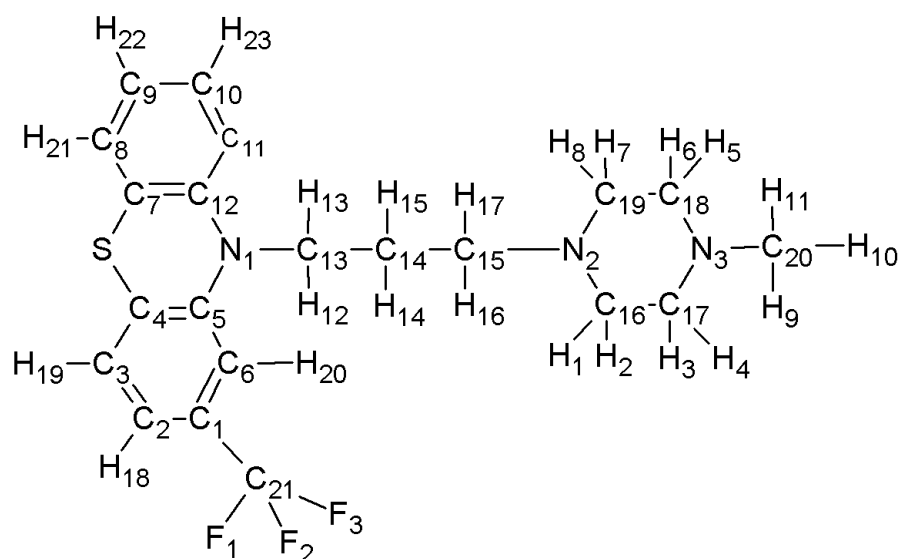

Figure 1S. Trifluoperazine (TFP), including the atom naming scheme used elsewhere in this paper.

Table 1S. TFP force field charge parameters (in electron units); see Figure 1S for atom naming scheme.

|                  |         |         |         |         |        |         |         |         |
|------------------|---------|---------|---------|---------|--------|---------|---------|---------|
| <b>Atom</b>      | C1      | C2      | C3      | C4      | C5     | C6      | C7      | C8      |
| <b>Charge(e)</b> | -0.0674 | -0.2458 | -0.0264 | -0.0595 | 0.2753 | -0.2516 | -0.0818 | -0.0335 |
| <b>Atom</b>      | C9      | C10     | C11     | C12     | C13    | C14     | C15     | C16     |
| <b>Charge(e)</b> | -0.2525 | -0.1140 | -0.2605 | 0.3496  | 0.0019 | 0.2154  | -0.1486 | -0.1330 |
| <b>Atom</b>      | C17     | C18     | C19     | C20     | C21    | N1      | N2      | N3      |
| <b>Charge(e)</b> | -0.1501 | -0.1501 | -0.1330 | -0.2580 | 0.7292 | -0.3961 | -0.2651 | -0.2216 |
| <b>Atom</b>      | F1      | F2      | F3      | S       | H1     | H2      | H3      | H4      |
| <b>Charge(e)</b> | -0.2368 | -0.2368 | -0.2368 | -0.1432 | 0.1116 | 0.1116  | 0.1160  | 0.1160  |
| <b>Atom</b>      | H5      | H6      | H7      | H8      | H9     | H10     | H11     | H12     |
| <b>Charge(e)</b> | 0.1160  | 0.1160  | 0.1116  | 0.1116  | 0.1060 | 0.1060  | 0.1060  | 0.0505  |
| <b>Atom</b>      | H13     | H14     | H15     | H16     | H17    | H18     | H19     | H20     |
| <b>Charge(e)</b> | 0.0505  | -0.0118 | -0.0118 | 0.0661  | 0.0661 | 0.1758  | 0.1376  | 0.1760  |
| <b>Atom</b>      | H21     | H22     | H23     | H24     |        |         |         |         |
| <b>Charge(e)</b> | 0.1390  | 0.1630  | 0.1524  | 0.1493  |        |         |         |         |

Table.2S Binding energy of the top three complexes of Fas with CaM bound to different number of TFP calculated from RDOCK program (unit: kcal/mol)

|                      | CaM_1TFP_Fas      |                  |                  |                      |
|----------------------|-------------------|------------------|------------------|----------------------|
|                      | $\Delta E_{elec}$ | $\Delta E_{Vdw}$ | $\Delta G_{ACE}$ | $\Delta G_{binding}$ |
| Rank:1 <sup>st</sup> | -33.74            | -39.20           | 13.50            | -16.87               |
| Rank:2 <sup>nd</sup> | -33.18            | -36.03           | 15.82            | -14.04               |
| Rank:3 <sup>rd</sup> | -30.30            | -48.07           | 13.78            | -13.49               |

|                      | CaM_2TFP_Fas      |                  |                  |                      |
|----------------------|-------------------|------------------|------------------|----------------------|
|                      | $\Delta E_{elec}$ | $\Delta E_{Vdw}$ | $\Delta G_{ACE}$ | $\Delta G_{binding}$ |
| Rank:1 <sup>st</sup> | -28.55            | -31.38           | 10.07            | -15.625              |
| Rank:2 <sup>nd</sup> | -27.71            | -40.86           | 9.37             | -15.569              |
| Rank:3 <sup>rd</sup> | -30.33            | -33.80           | 13.72            | -13.577              |

|                      | CaM_4TFP_Fas      |                  |                  |                      |
|----------------------|-------------------|------------------|------------------|----------------------|
|                      | $\Delta E_{elec}$ | $\Delta E_{Vdw}$ | $\Delta G_{ACE}$ | $\Delta G_{binding}$ |
| Rank:1 <sup>st</sup> | -46.67            | -69.15           | 21.02            | -20.983              |
| Rank:2 <sup>nd</sup> | -35.67            | -53.71           | 14.19            | -17.913              |
| Rank:3 <sup>rd</sup> | -27.01            | -23.94           | 7.12             | -17.189              |

All values in this table were expressed in terms of kcal/mol.  $\Delta E_{Vdw}$  is the van der Waals energy,  $\Delta E_{elec}$  is the electrostatic energy,  $\Delta G_{ACE}$  is the atomic contact energy.

The energy information for top3 structure in CaM-Fas complex with different number of TFP are listed above. The  $\Delta G_{binding}$  information indicate the complex is energy favorable, and also the value of  $\Delta G_{binding}$  energy is within the reasonable range of binding energy.

Table.3S Size of the periodic box for the six systems simulated in this study

| System | TFP - CaM complex | CaM - Fas complex    | Size of the periodic box (unit: nm) |
|--------|-------------------|----------------------|-------------------------------------|
| 1      | 1TFP – CaM        |                      | 7.2 × 7.3 × 7.1                     |
| 2      | 2TFP – CaM        |                      | 7.7 × 7.3 × 8.0                     |
| 3      | 4TFP – CaM        |                      | 7.6 × 8.1 × 6.9                     |
| 4      |                   | 1TFP bound CaM – Fas | 7.5 × 12.2 × 8.4                    |
| 5      |                   | 2TFP bound CaM – Fas | 8.8 × 10.8 × 8.2                    |
| 6      |                   | 4TFP bound CaM – Fas | 9.5 × 10.9 × 9.1                    |

## Equilibration of the TFP-CaM complexes

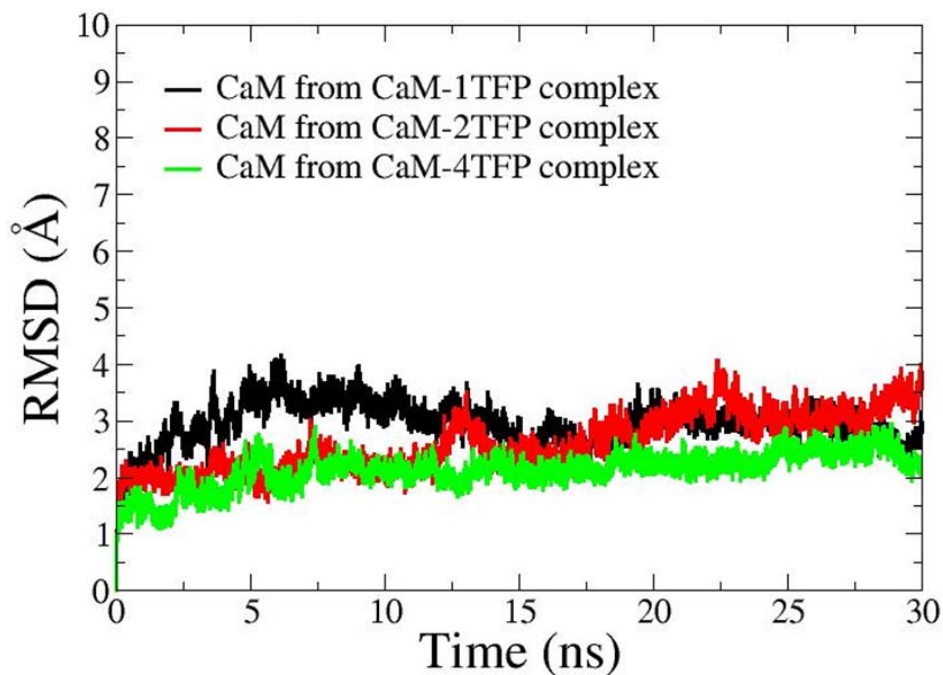

Figure 2S. Root mean squared deviation (RMSD) for CaM in the TFP-CaM complexes over the 30ns MD simulation for different simulation cases.

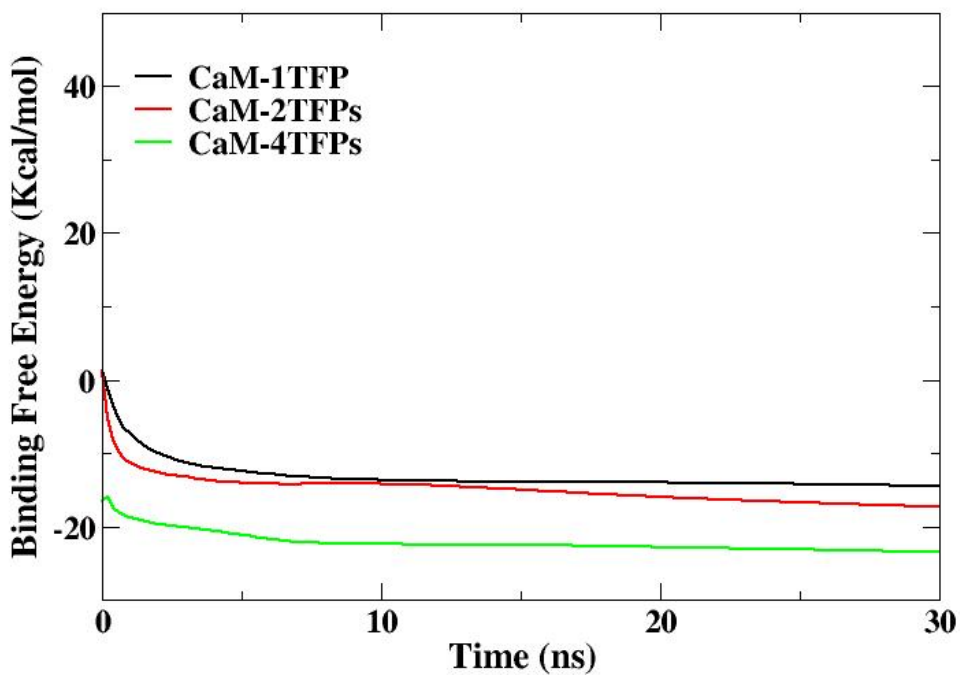

Figure 3S. Binding free energy between CaM with TFP molecule(s) in the TFP-CaM complexes as a function of cumulative time over the 30ns MD simulation for different simulation cases.

## Equilibration of the TFP-bound CaM/Fas complexes

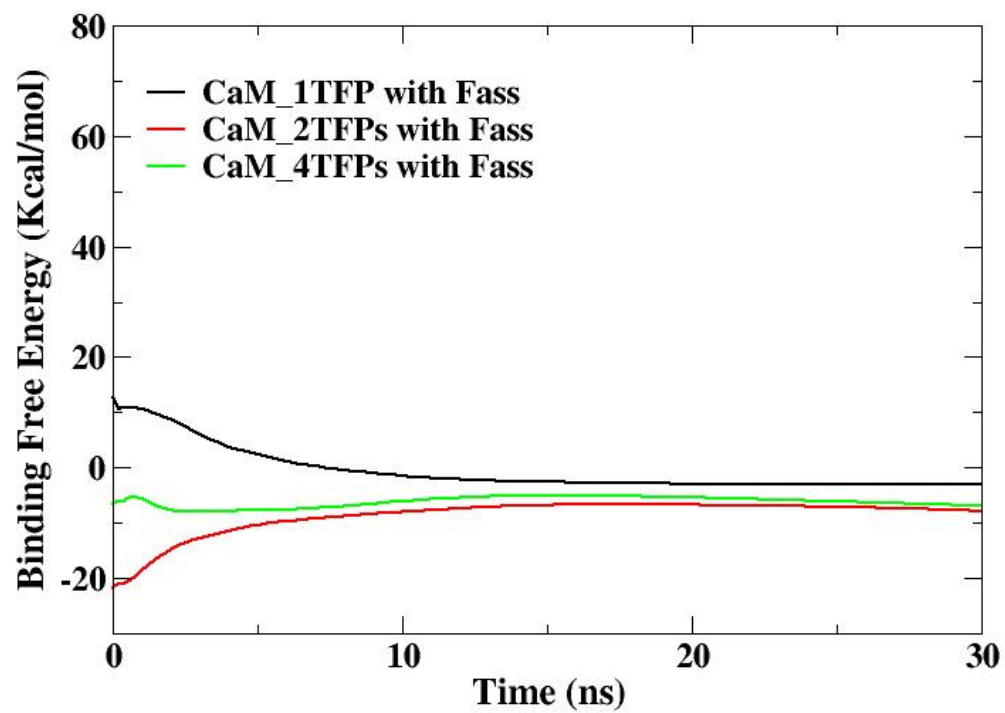

Figure 4S. Binding free energy of Fas-CaM complexes as a function of cumulative time over the 30ns MD simulation for different simulation cases.

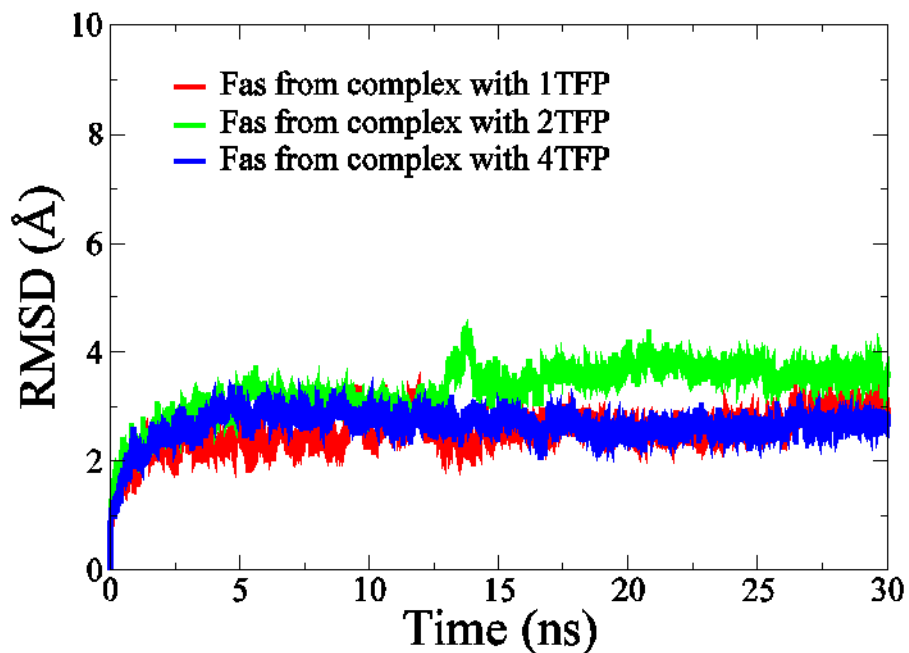

Figure 5S. RMSD for the Fas Death Domain protein core (res 225-318) in the CaM-Fas complexes over the 30ns MD simulation for different simulation cases.

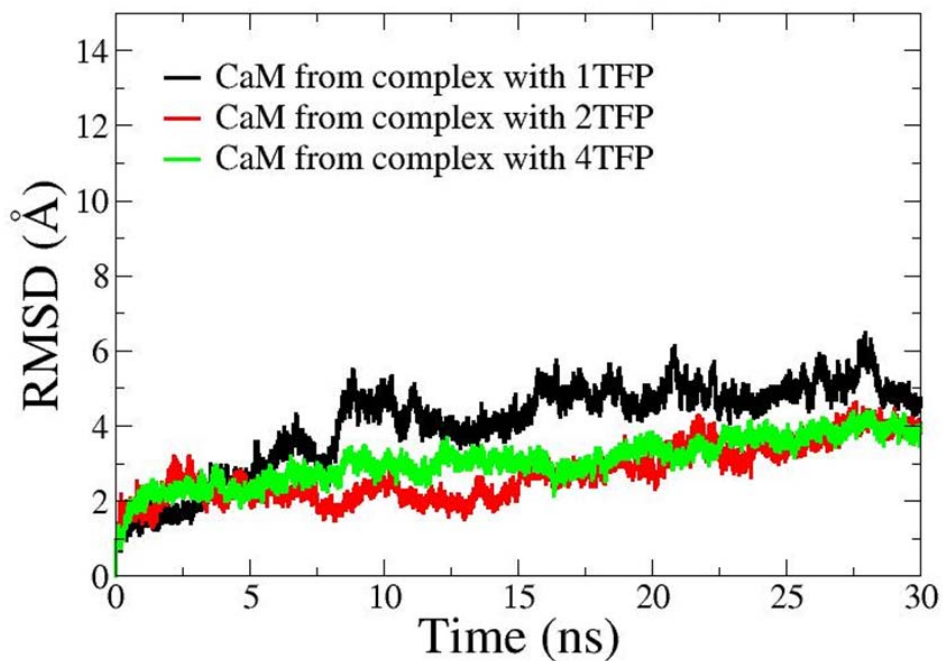

Figure 6S. RMSD for CaM in the CaM-Fas complexes over the 30ns MD simulation for different simulation cases.

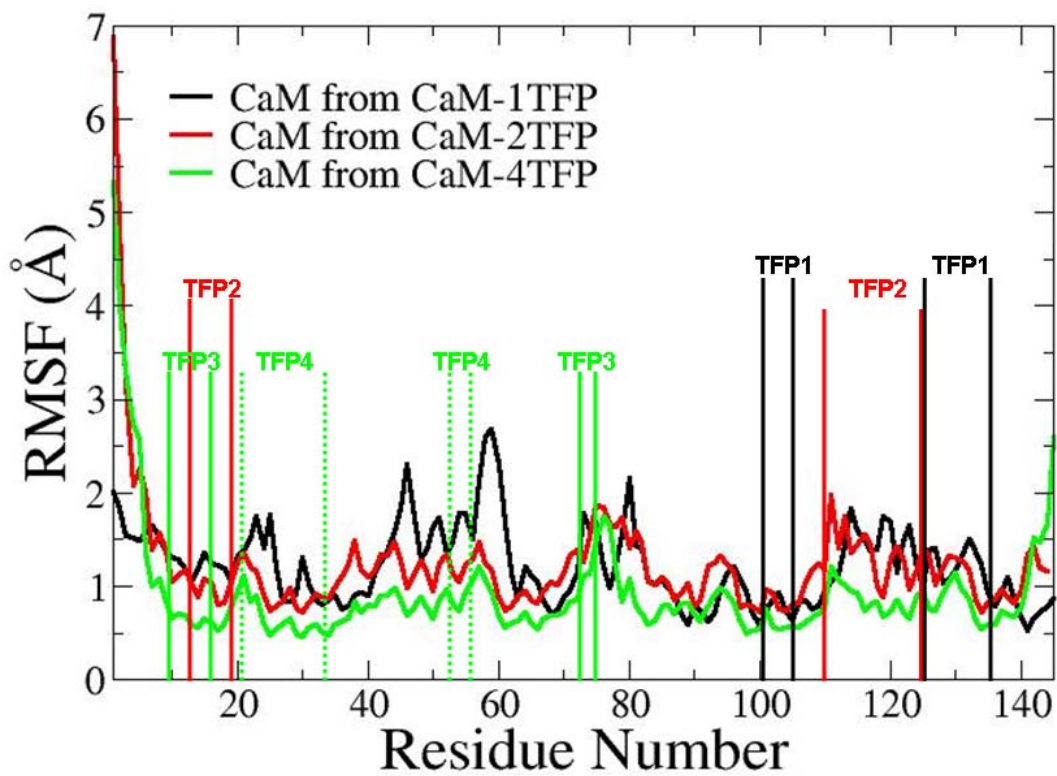

Figure 7S. Root mean squared fluctuation (RMSF) comparison of CaM in different TFP-CaM complexes

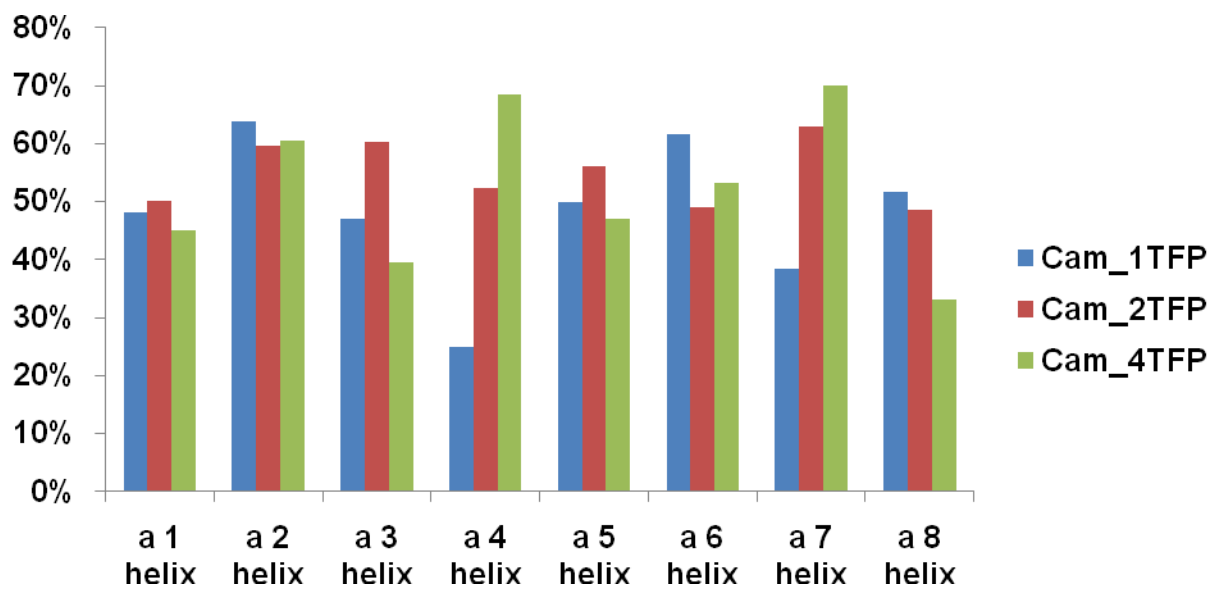

Figure 8S. Hydrogen bond occupancy of each  $\alpha$  helix of CaM in TFP-CaM complexes.



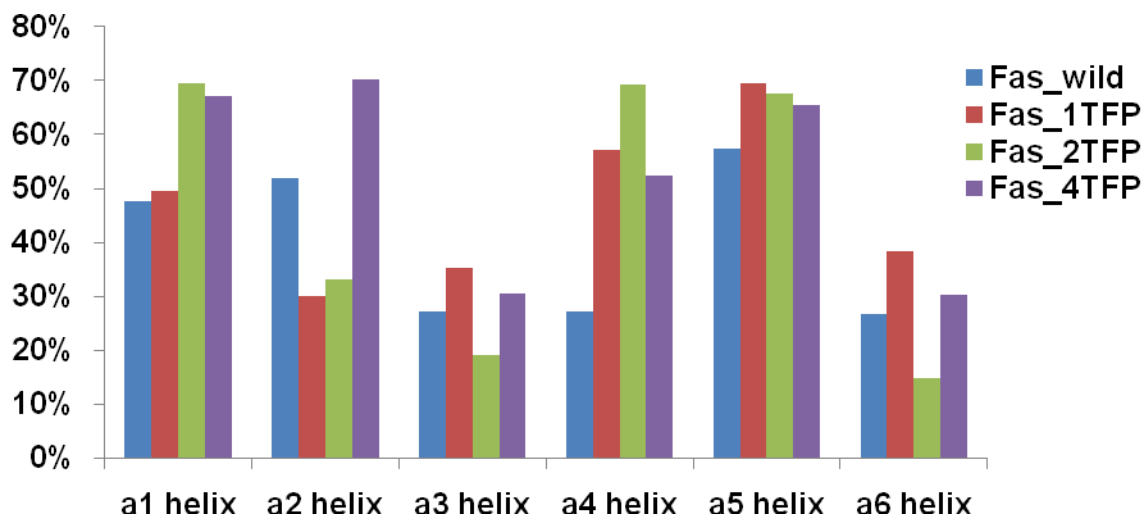

Figure 9S. Hydrogen bond occupancy of each  $\alpha$  helix of Fas in CaM-Fas complexes.

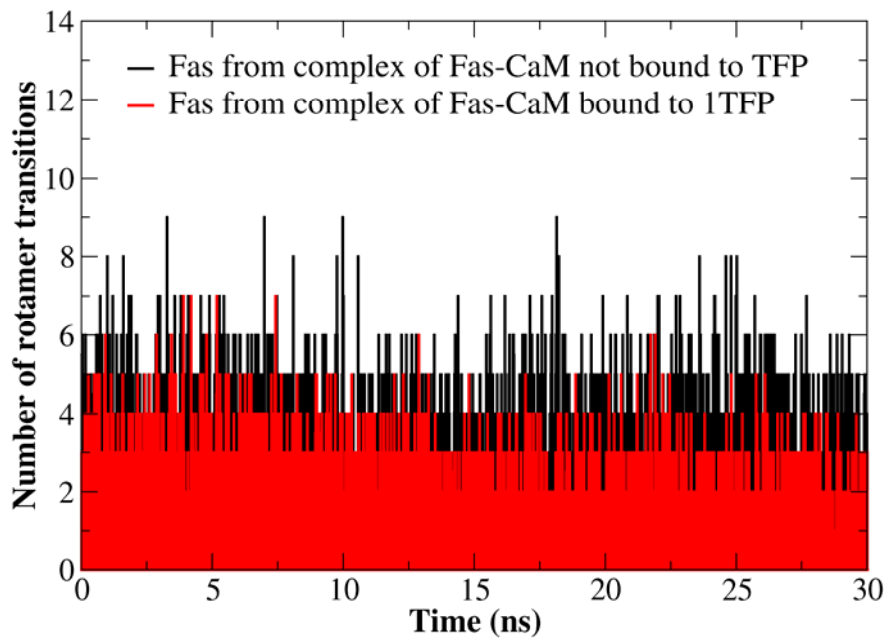

(A)

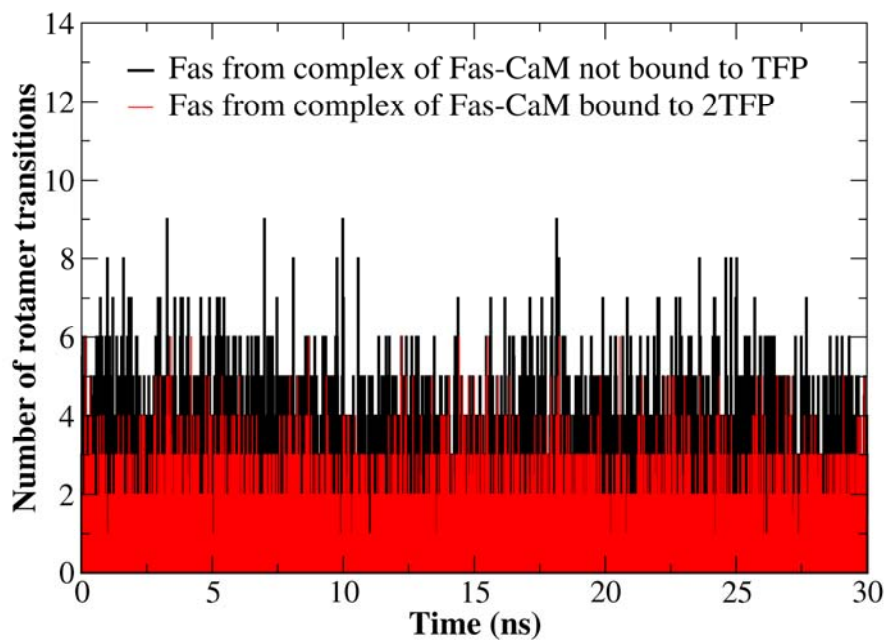

(B)

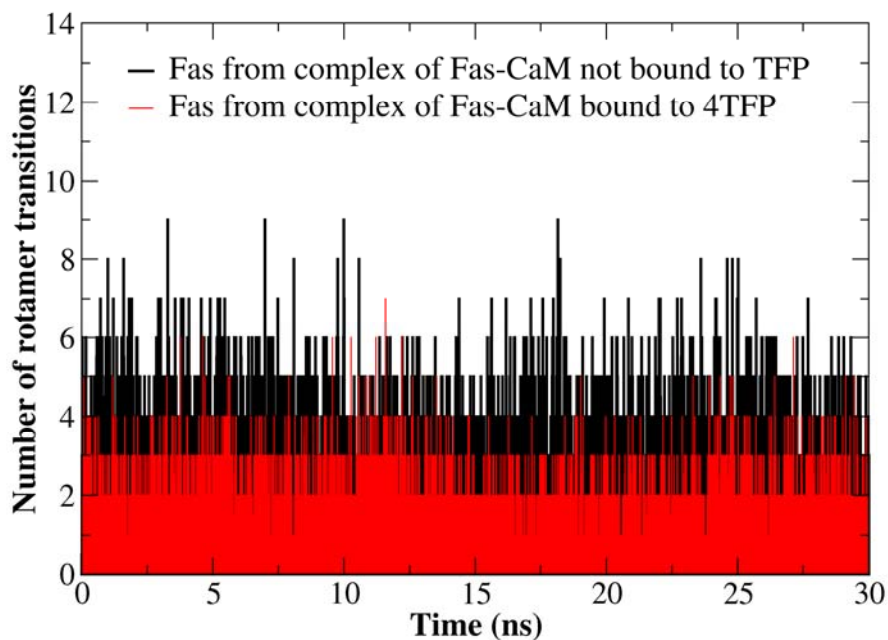

(C)

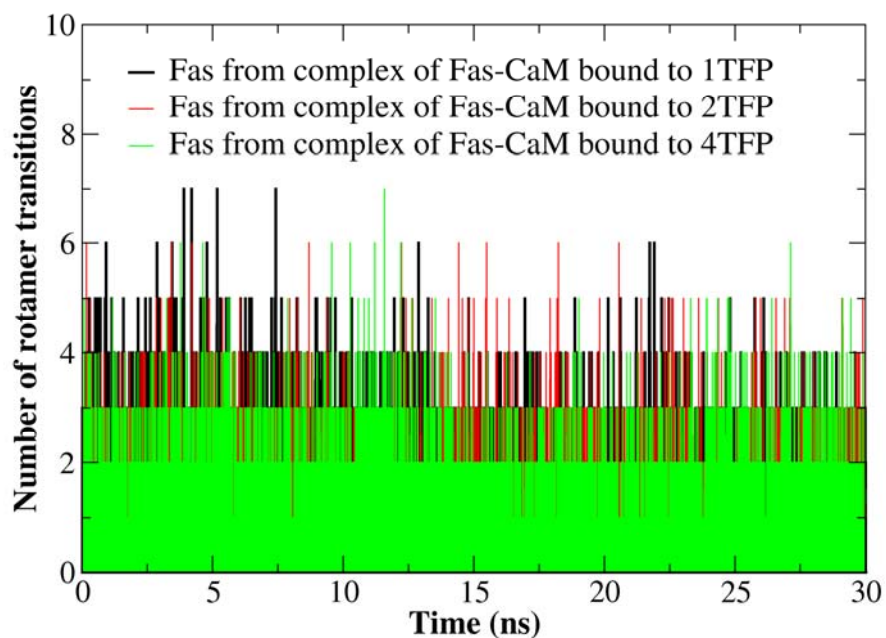

(D)

Figure 10S. The number of dihedral angle transition for all residues of Fas from CaM-Fas complexes over time. (A) Fas DD from wildtype CaM-Fas complex [ref 6] compared to the Fas DD from CaM-1TFP-Fas complex. (B) Fas DD from wildtype CaM-Fas complex [ref 6] compared to the Fas DD from CaM-2TFPs-Fas complex. (C) Fas DD from wildtype CaM-Fas complex [ref 6] compared to the Fas DD from CaM-4TFPs-Fas complex. (D) The comparison of

Fas DD from CaM-1TFP-Fas complex, CaM-2TFPs-Fas complex and CaM-4TFPs-Fas complex.
